# Supplementary material
Source: Research Square preprint supplement (doi:10.21203/rs.3.rs-9185034/v1)
Supplement: Supplementary file 1 [file 2e6d107bf24e09f07a40de0c.xlsx]

## Sheet: Sheet1
sgRNA Name	Sequence (+PAM)
gMYC1	GTGGAAAGAACCCTATATAC AGG
gMYC2	CATGCCACCAGAGGGTCAAC AGG
gMyc1	GATGACTTAACATAACAATC AGG
gMyc2	AGGTTCTAGCCCTACTAGAGGGG
gPten	AGATCGTTAGCAGAAACAAA AGG
gTrp53	CCTCGAGCTCCCTCTGAGCC AGG
Primer name	Primer sequences
Primer-F1	GAGAATAGCAGAGGAGGGTG
Primer-R1	GTACACTACACCTCTGAACTAG
Primer-F2	ACGTTGGTGTTGATGTTGCTC
Primer-R2	GCTCCAGCAACACAGAATTAC
Primer-F3	GAATGCAGAGGACCACAGCATA
Primer-R3	CCTCCCTAGAACATGTCAAGTATG
Primer-F4	CAAGCATGACAATCCCTCAAAG
Primer-R4	GGAAACATCAGGAATTCAAGGCTC
qPCR-mouse-Gapdh-F	CCTGTTTCTTGTCTTTCAGATTTG
qPCR-mouse-Gapdh-R	GCCTTGACTGTGCCGTTG
qPCR-mouse-ecMYC-junctuon-F	TCACCATGCTTTGTCGAACAAGG
qPCR-mouse-ecMYC-junctuon-R	AGACTTGTTCAAGGGCTAAATGTG
