# Supplementary material
Source: Research Square preprint supplement (doi:10.21203/rs.3.rs-9185034/v1)
Supplement: Supplementary file 1 [file d6758aef8fc1651612da1390.docx]

**Supplemenary Table 3:** Physicochemical properties of sgRNA-LNPs dispersed in D-PBS, pH 7.4.

| **Code** | **Weight ratio** | **Lipid composition (mol%)** | | | | | | | **LNP characteristics** | | | **RNA** |
| --- | --- | --- | --- | --- | --- | --- | --- | --- | --- | --- | --- | --- |
| **C12-200: RNA (w:w)** | **C12-200** | **DOPE** | **Cholesterol** |  | | **DMPE-PEG2000** | | **Size (nm)** | **PDI** | **RNA encapsulation efficiency (%)** |
| Y12 | 10 | 35 | 16 | 46.5 | |  | | 2.5 | 102.0 | 0.214 | 96.3 | *sgRNA_Pten* |
| Y13 | 10 | 35 | 16 | 46.5 | |  | | 2.5 | 81.6 | 0.151 | 95.8 | *sgRNA_Trp53* |
| Y14 | 10 | 35 | 16 | 46.5 | |  | | 2.5 | 82.8 | 0.198 | 94.6 | *sgRNA_Myc_1* |
| Y15 | 10 | 35 | 16 | 46.5 | |  | | 2.5 | 79.5 | 0.167 | 97.5 | *sgRNA_Myc_2* |
