# Supplementary material
Source: Research Square preprint supplement (doi:10.21203/rs.3.rs-9185034/v1)
Supplement: Supplementary file 2 [file 7c92fdb2f2ba8a2580859340.xlsx]

## Sheet: Mice injection and collection
Group.No	Injection Treatment	Mice.No	CCL4 injection treatment	Date of injection	Date of euthanasia	Tumor grade	Sample Name
1 (N=3)	Vehicle control	313	No	06/09/2023	04/04/2024	0	Mm_CRliv_313_NT_1
							Mm_CRliv_313_NT_2
		315	No	06/09/2023	04/04/2025	0	Mm_CRliv_315_NT_1
							Mm_CRliv_315_NT_2
		250	No	06/09/2023	04/04/2026	0	Mm_CRliv_250_NT_1
							Mm_CRliv_250_NT_2
2 (N=3)	gMyc1 & gMyc2	301	No	06/09/2023	04/04/2024	0	Mm_CRliv_301_NT_1
							Mm_CRliv_301_NT_2
							Mm_CRliv_301_NT_3
		305	No	06/09/2023	04/04/2024	0	Mm_CRliv_305_NT_1
							Mm_CRliv_305_NT_2
							Mm_CRliv_305_NT_3
		303	No	06/09/2023	16/02/2024	0	Mm_CRliv_303_NT_1
							Mm_CRliv_303_NT_1
							Mm_CRliv_303_NT_2
							Mm_CRliv_303_NT_2
3 (N=6)	gPten	276	No	06/09/2023	04/04/2024	1	Mm_CRliv_276_TT_1
							Mm_CRliv_276_AT_1
							Mm_CRliv_276_AT_2
		278	No	06/09/2023	04/04/2024	0	Mm_CRliv_278_NT_1
							Mm_CRliv_278_NT_2
		282	No	06/09/2023	04/04/2025	0	Mm_CRliv_282_NT_1
							Mm_CRliv_282_NT_2
		317	No	06/09/2023	04/04/2024	3	Mm_CRliv_317_TT_1
							Mm_CRliv_317_TT_2
							Mm_CRliv_317_AT_1
							Mm_CRliv_317_AT_2
		284	No	06/09/2023	23/02/2024	0	Mm_CRliv_284_TT_1
							Mm_CRliv_284_TT_2
							Mm_CRliv_284_TT_3
							Mm_CRliv_284_AT_1
							Mm_CRliv_284_AT_2
		280	No	06/09/2023	04/04/2024	0	Mm_CRliv_284_TT_1
							Mm_CRliv_284_TT_2
							Mm_CRliv_284_AT_1
							Mm_CRliv_284_AT_2
4 (N=6)	gPten & gMyc1 & gMyc2	311	No	06/09/2023	04/04/2024	4	Mm_CRliv_311_TT_1
							Mm_CRliv_311_TT_2
							Mm_CRliv_311_TT_3
							Mm_CRliv_311_TT_4
							Mm_CRliv_311_TT_5
							Mm_CRliv_311_AT_1
							Mm_CRliv_311_AT_2
		309	No	06/09/2023	13/09/2023	/		The mouse was euthanized 7 days post-injection for the assessment of gene-editing efficiency
		286	No	06/09/2023	04/04/2024	0	Mm_CRliv_286_NT_1
							Mm_CRliv_286_NT_2
		190	No	06/09/2023	04/04/2024	2	Mm_CRliv_190_TT_1
							Mm_CRliv_190_TT_2
							Mm_CRliv_190_AT_1
							Mm_CRliv_190_AT_2
		288	No	06/09/2023	22/03/2024	0	Mm_CRliv_288_NT_1
							Mm_CRliv_288_NT_1
		307	No	06/09/2023	22/03/2024	4	Mm_CRliv_307_TT_1
							Mm_CRliv_307_TT_2
							Mm_CRliv_307_TT_3
							Mm_CRliv_307_TT_4
							Mm_CRliv_307_TT_5
							Mm_CRliv_307_TT_6
							Mm_CRliv_307_AT_1
							Mm_CRliv_307_AT_2
5 (N=5)	Vehicle control	267	Yes	06/09/2023	04/04/2024	0	Mm_CRliv_267_NT_1
							Mm_CRliv_267_NT_2
		269	Yes	06/09/2023	04/04/2025	0	Mm_CRliv_269_NT_1
							Mm_CRliv_269_NT_2
		271	Yes	06/09/2023	04/04/2026	0	Mm_CRliv_271_NT_1
							Mm_CRliv_271_NT_2
		264	Yes	06/09/2023	04/04/2027	0	Mm_CRliv_264_NT_1
							Mm_CRliv_264_NT_2
		266	Yes	06/09/2023	04/04/2028	0	Mm_CRliv_266_NT_1
							Mm_CRliv_266_NT_2
6 (N=3)	gMyc1 & gMyc2	258	Yes	06/09/2023	04/04/2029	0	Mm_CRliv_258_NT_1
							Mm_CRliv_258_NT_2
		260	Yes	06/09/2024	04/04/2030	0	Mm_CRliv_260_NT_1
							Mm_CRliv_260_NT_2
		262	Yes	06/09/2025	04/04/2031	0	Mm_CRliv_262_NT_1
							Mm_CRliv_262_NT_2
7 (N=5)	gPten	287	Yes	06/09/2023	04/04/2031	1	Mm_CRliv_287_TT_1
							Mm_CRliv_287_AT_1
							Mm_CRliv_287_AT_2
		289	Yes	06/09/2023	04/04/2031	2	Mm_CRliv_289_TT_1
							Mm_CRliv_289_TT_2
							Mm_CRliv_289_TT_3
							Mm_CRliv_289_AT_1
							Mm_CRliv_289_AT_2
		291	Yes	06/09/2023	04/04/2031	2	Mm_CRliv_291_TT_1
							Mm_CRliv_291_TT_2
							Mm_CRliv_291_TT_3
							Mm_CRliv_291_AT_1
		295	Yes	06/09/2023	04/04/2031	2	Mm_CRliv_295_TT_1
							Mm_CRliv_295_TT_2
							Mm_CRliv_295_TT_3
							Mm_CRliv_295_AT_1
							Mm_CRliv_295_AT_2
		297	Yes	06/09/2023	22/03/2024	2	Mm_CRliv_297_TT_1
							Mm_CRliv_297_TT_2
							Mm_CRliv_297_TT_3
							Mm_CRliv_297_AT_1
8 (N=6)	gPten & gMyc1 & gMyc2	277	Yes	06/09/2023	16/02/2024	3	Mm_CRliv_277_TT_1
							Mm_CRliv_277_TT_2
							Mm_CRliv_277_TT_3
							Mm_CRliv_277_TT_4
							Mm_CRliv_277_AT_1
							Mm_CRliv_277_AT_2
		279	Yes	06/09/2023	15/03/2024	2	Mm_CRliv_279_TT_1
							Mm_CRliv_279_TT_2
							Mm_CRliv_279_TT_3
							Mm_CRliv_279_AT_1
							Mm_CRliv_279_AT_2
		281	Yes	06/09/2023	22/03/2024	2	Mm_CRliv_281_TT_1
							Mm_CRliv_281_TT_2
							Mm_CRliv_281_TT_3
							Mm_CRliv_281_TT_4
							Mm_CRliv_281_AT_1
							Mm_CRliv_281_AT_2
		237	Yes	06/09/2023	04/04/2024	3	Mm_CRliv_237_TT_1
							Mm_CRliv_237_TT_2
							Mm_CRliv_237_TT_3
							Mm_CRliv_237_TT_4
							Mm_CRliv_237_TT_5
							Mm_CRliv_237_AT_1
							Mm_CRliv_237_AT_2
		239	Yes	06/09/2023	04/04/2024	2	Mm_CRliv_239_TT_1
							Mm_CRliv_239_TT_2
							Mm_CRliv_239_TT_3
							Mm_CRliv_239_AT_1
							Mm_CRliv_239_AT_2
		243	Yes	06/09/2023	04/04/2024	3	Mm_CRliv_243_TT_1
							Mm_CRliv_243_TT_2
							Mm_CRliv_243_TT_3
							Mm_CRliv_243_TT_4
							Mm_CRliv_243_TT_5
							Mm_CRliv_243_AT_1
9 (N=5)	gTrp53	268	Yes	06/09/2023	15/03/2024	2	Mm_CRliv_268_TT_1
							Mm_CRliv_268_TT_2
							Mm_CRliv_268_TT_3
							Mm_CRliv_268_AT_1
							Mm_CRliv_268_AT_2
		270	Yes	06/09/2023	22/03/2024	2	Mm_CRliv_270_TT_1
							Mm_CRliv_270_TT_2
							Mm_CRliv_270_TT_3
							Mm_CRliv_270_AT_1
		272	Yes	06/09/2023	05/03/2024	2	Mm_CRliv_272_TT_1
							Mm_CRliv_272_TT_2
							Mm_CRliv_272_TT_3
							Mm_CRliv_272_TT_4
							Mm_CRliv_272_TT_5
							Mm_CRliv_272_TT_6
							Mm_CRliv_272_AT_1
		274	Yes	06/09/2023	02.02.2024	0	Mm_CRliv_274_NT_1
							Mm_CRliv_274_NT_2
							Mm_CRliv_274_NT_3
							Mm_CRliv_274_NT_4
		299	Yes	06/09/2023	20/02/2024	5	Mm_CRliv_299_TT_1
							Mm_CRliv_299_TT_2
							Mm_CRliv_299_TT_3
							Mm_CRliv_299_AT_1
							Mm_CRliv_299_AT_2
10 (N=5)	gTrp53 & gMyc1 & gMyc2	283	Yes	06/09/2023	15/03/2024	2	Mm_CRliv_283_TT_1
							Mm_CRliv_283_TT_2
							Mm_CRliv_283_TT_3
							Mm_CRliv_283_TT_4
							Mm_CRliv_283_TT_5
		292	Yes	06/09/2023	09/02/2024	3	Mm_CRliv_292_TT_1
							Mm_CRliv_292_TT_2
							Mm_CRliv_292_TT_3
							Mm_CRliv_292_TT_4
							Mm_CRliv_292_TT_5
							Mm_CRliv_292_AT_1
							Mm_CRliv_292_AT_2
							Mm_CRliv_292_AT_3
		294	Yes	06/09/2023	22/03/2024	4	Mm_CRliv_294_TT_1
							Mm_CRliv_294_TT_2
							Mm_CRliv_294_TT_3
							Mm_CRliv_294_TT_4
							Mm_CRliv_294_TT_5
							Mm_CRliv_294_TT_6
							Mm_CRliv_294_AT_1
							Mm_CRliv_294_AT_2
		296	Yes	06/09/2023	05/03/2024	4	Mm_CRliv_296_TT_1
							Mm_CRliv_296_TT_2
							Mm_CRliv_296_TT_3
							Mm_CRliv_296_AT_1
							Mm_CRliv_296_AT_2
		298	Yes	06/09/2023	31.01.2024	3	Mm_CRliv_298_TT_1
							Mm_CRliv_298_TT_2
							Mm_CRliv_252_AT_1
							Mm_CRliv_252_AT_2
11 (N=5)	Met vehicle	255	Yes	06/09/2023	15/03/2024	0	Mm_CRliv_255_NT_1
							Mm_CRliv_255_NT_2
		245	Yes	06/09/2023	04/04/2024	0	Mm_CRliv_245_NT_1
							Mm_CRliv_245_NT_2
		247	Yes	06/09/2023	04/04/2024	0	Mm_CRliv_247_NT_1
							Mm_CRliv_247_NT_2
		249	Yes	06/09/2023	04/04/2024	0	Mm_CRliv_249_NT_1
							Mm_CRliv_249_NT_2
		257	Yes	06/09/2023	04/04/2024	3	Mm_CRliv_257_TT_1
							Mm_CRliv_257_TT_2
							Mm_CRliv_257_TT_3
							Mm_CRliv_257_AT_1
							Mm_CRliv_257_AT_2
12 (N=5)	Met vehicle & gMyc1 & gMyc2	230	Yes	06/09/2023	04/04/2024	0	Mm_CRliv_230_NT_1
							Mm_CRliv_230_NT_2
		232	Yes	06/09/2023	04/04/2024	0	Mm_CRliv_232_NT_1
							Mm_CRliv_232_NT_2
		234	Yes	06/09/2023	04/04/2024	0	Mm_CRliv_234_NT_1
							Mm_CRliv_234_NT_2
		236	Yes	06/09/2023	04/04/2024	0	Mm_CRliv_236_NT_1
							Mm_CRliv_236_NT_2
		261	Yes	06/09/2023	04/04/2024	0	Mm_CRliv_261_NT_1
							Mm_CRliv_261_NT_2
13 (N=6)	Met vehicle & gTrp53	252	Yes	06/09/2023	08/01/2024	3	Mm_CRliv_252_TT_1
							Mm_CRliv_252_TT_2
							Mm_CRliv_252_TT_3
							Mm_CRliv_252_TT_4
							Mm_CRliv_252_AT_1
							Mm_CRliv_252_AT_2
							Mm_CRliv_252_AT_3
							Mm_CRliv_252_AT_4
		244	Yes	06/09/2023	11/01/2024	3	Mm_CRliv_244_TT_1
							Mm_CRliv_244_TT_2
							Mm_CRliv_244_TT_3
							Mm_CRliv_244_TT_4
							Mm_CRliv_244_AT_1
							Mm_CRliv_244_AT_2
							Mm_CRliv_244_AT_3
							Mm_CRliv_244_AT_4
		246	Yes	06/09/2023	25/01/2024	2	Mm_CRliv_246_TT_1
							Mm_CRliv_246_TT_2
		256	Yes	06/09/2023	23/02/2024	4	Mm_CRliv_256_TT_1
							Mm_CRliv_256_TT_2
							Mm_CRliv_256_TT_3
							Mm_CRliv_256_TT_4
							Mm_CRliv_256_AT_1
		254	Yes	06/09/2023	04/04/2024	0	Mm_CRliv_254_TT_1
							Mm_CRliv_254_TT_2
							Mm_CRliv_254_TT_3
		248	Yes	06/09/2023	15/03/2024	5	Mm_CRliv_248_TT_1
							Mm_CRliv_248_TT_2
							Mm_CRliv_248_TT_3
							Mm_CRliv_248_AT_1
							Mm_CRliv_248_AT_2
14 (N=5)	Met vehicle & gTrp53 & gMyc1 & gMyc2	233	Yes	06/09/2023	13/09/2023	/		The mouse was euthanized 7 days post-injection for the assessment of gene-editing efficiency
		235	Yes	06/09/2023	31/01/2024	5	Mm_CRliv_235_TT_1
							Mm_CRliv_235_TT_2
							Mm_CRliv_235_TT_3
							Mm_CRliv_235_TT_4
							Mm_CRliv_235_TT_5
							Mm_CRliv_235_TT_6
							Mm_CRliv_235_AT_1
							Mm_CRliv_235_AT_2
		238	Yes	06/09/2023	31/01/2024	0	Mm_CRliv_238_NT_1
							Mm_CRliv_238_NT_2
		240	Yes	06/09/2023	23/02/2024	5	Mm_CRliv_240_TT_1
							Mm_CRliv_240_TT_2
							Mm_CRliv_240_TT_3
							Mm_CRliv_240_TT_4
							Mm_CRliv_240_TT_5
							Mm_CRliv_240_TT_6
							Mm_CRliv_240_TT_7
							Mm_CRliv_240_AT_1
							Mm_CRliv_240_AT_2
							Mm_CRliv_240_AT_3
		259	Yes	06/09/2023	15/03/2024	4	Mm_CRliv_259_TT_1
							Mm_CRliv_259_TT_2
							Mm_CRliv_259_TT_3
							Mm_CRliv_259_TT_4
							Mm_CRliv_259_TT_5
							Mm_CRliv_259_AT_1
							Mm_CRliv_259_AT_2
